# Supplementary material for: Modelling of P3HT:PCBM interface using coarse-grained forcefield derived from accurate atomistic forcefield
Source: Royal Society of Chemistry journal article supplement (doi:10.1039/c3cp54308k), 2013-12-03
Supplement: c3cp54308k.pdf [file c3cp54308k.pdf]

# Modelling of P3HT:PCBM interface using coarse-grained forcefield derived from accurate atomistic forcefield

## Supplementary information

### A. Coarse-grained P3HT Forcefield

#### A.1. Forcefield

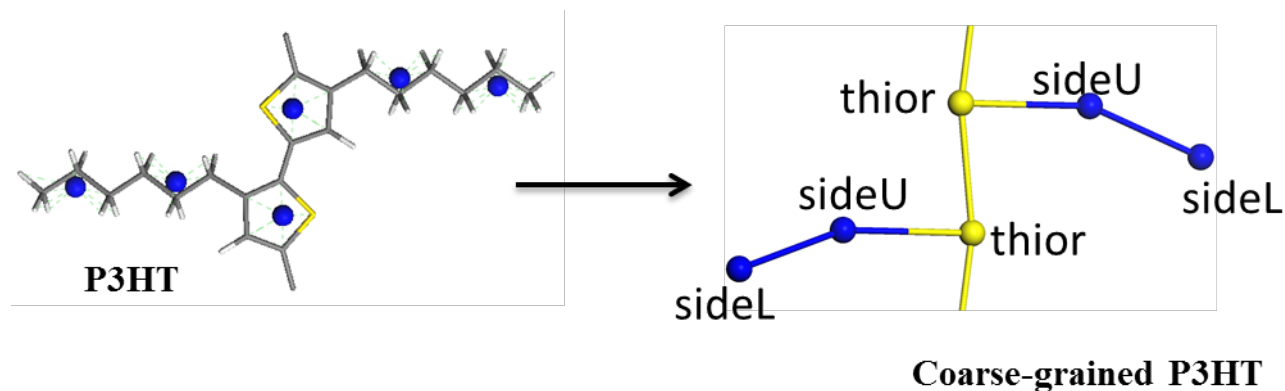

Figure. A1. Forcefield type notations for coarse-grained P3HT system used in this work

| Forcefield Type | $\epsilon$ (kcal·mol <sup>-1</sup> ) | $\sigma$ (Å) | $q$ (e) |
|-----------------|--------------------------------------|--------------|---------|
| thior           | 0.4368                               | 3.385        | -0.1087 |
| sideU           | 0.2948                               | 4.517        | 0.0957  |
| sideL           | 0.3182                               | 4.287        | 0.0129  |

Table. A1. Diagonal Van der Waals parameters and charges. The corresponding off diagonal VDW terms are derived therfrom following geometric mixing rules.

| i     | j     | $k_{bonds}$ (kcal·mol <sup>-1</sup> ·Å <sup>2</sup> ) | $r_0$ (Å) |
|-------|-------|-------------------------------------------------------|-----------|
| sideU | sideL | 633.57                                                | 3.861     |
| thior | sideU | 2015.05                                               | 4.143     |
| thior | thior | 925.61                                                | 3.924     |

Table. A2. Bond stretching parameters

| i     | j     | k     | $k_{angle}$ (kcal·mol <sup>-1</sup> ·rad <sup>-2</sup> ) | $\theta_0$ (degree) |
|-------|-------|-------|----------------------------------------------------------|---------------------|
| sideL | sideU | thior | 448.25                                                   | 157.74              |
| thior | thior | sideU | 505.58                                                   | 110.08              |
| thior | thior | thior | 542.08                                                   | 171.38              |

Table. A3. Angle bending parameters

| i     | j     | k     | l     | $V_1(\text{kcal}\cdot\text{mol}^{-1})$ | $V_2(\text{kcal}\cdot\text{mol}^{-1})$ | $V_3(\text{kcal}\cdot\text{mol}^{-1})$ | $V_4(\text{kcal}\cdot\text{mol}^{-1})$ |
|-------|-------|-------|-------|----------------------------------------|----------------------------------------|----------------------------------------|----------------------------------------|
| sideU | thior | thior | sideU | -3.9697                                | 9.1853                                 | -1.7845                                | 2.4383                                 |

Table. A 4. Torsion parameters

## A.2. Fitting of Short Range Interaction

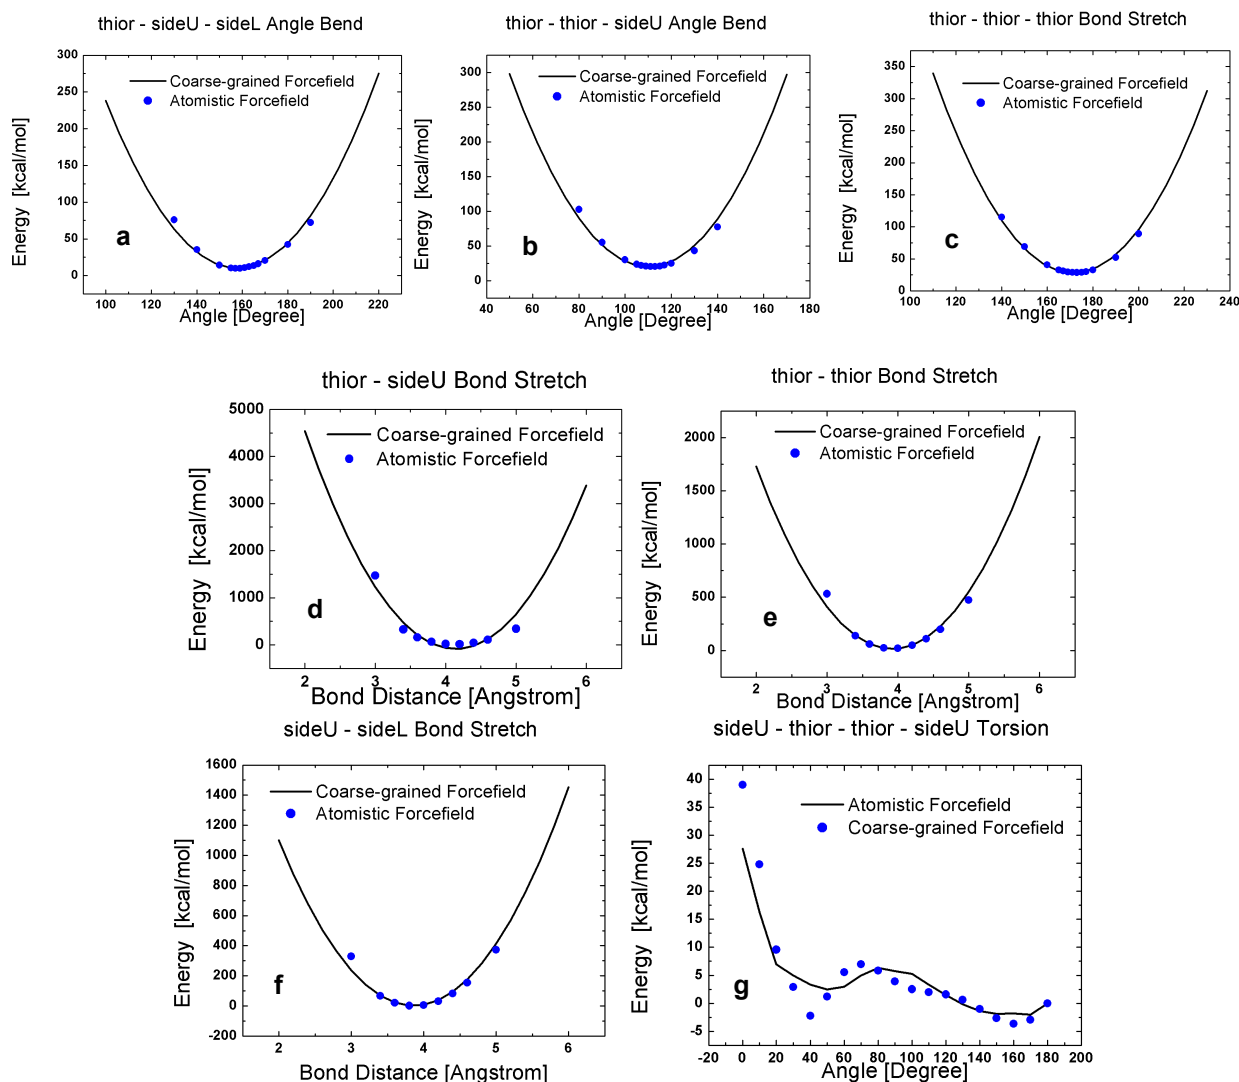

Figure. A2. Fitting against atomistic forcefield was used to obtain short range interaction parameters for coarse-grained forcefield. Here fitting results for all interaction contributions are shown with angle bending terms: a) thior-sideU-sideL, b) thior-thior-sideU and c) thior-thior-thior; bond stretching terms: d) thior-sideU, e) thior-thior and f) sideU-sideL; and torsion term: g) sideU-thior-thior-sideU

## B. Coarse-grained PCBM Forcefield

### B.1. Forcefield

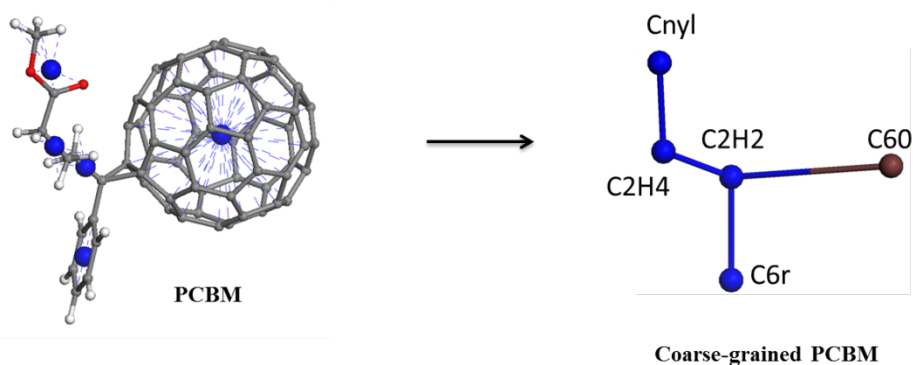

Figure. B1. Forcefield type notations for coarse-grained P3HT system used in this work

| Forcefield Type | $\epsilon$ (kcal·mol <sup>-1</sup> ) | $\sigma$ (Å) | $q$ (e) |
|-----------------|--------------------------------------|--------------|---------|
| C2H2            | 0.14784                              | 5.438        | -0.0280 |
| C2H4            | 0.19404                              | 5.456        | 0.1060  |
| C60             | 3.234                                | 9.355        | 0.0301  |
| C6r             | 0.4389                               | 3.763        | -0.1555 |
| Cnyl            | 0.47047                              | 6.650        | 0.0474  |

Table. B5. Diagonal Van der Waals parameters and charges. The corresponding off diagonal VDW terms are derived therfrom following geometric mixing rules.

| i    | j    | $k_{bonds}$ (kcal·mol <sup>-1</sup> ·Å <sup>2</sup> ) | $r_0$ (Å) |
|------|------|-------------------------------------------------------|-----------|
| C2H4 | C2H2 | 526.53                                                | 2.579     |
| C2H4 | Cnyl | 853.38                                                | 2.963     |
| C60  | C2H2 | 1202.30                                               | 5.573     |
| C6r  | C2H2 | 641.85                                                | 3.481     |

Table. B6. Bond stretching parameters

| i    | j    | k    | $k_{angle}$ (kcal·mol <sup>-1</sup> ·rad <sup>-2</sup> ) | $\theta_0$ (degree) |
|------|------|------|----------------------------------------------------------|---------------------|
| C2H2 | C2H4 | Cnyl | 519.67                                                   | 117.32              |
| C60  | C2H2 | C2H4 | 1948.96                                                  | 126.86              |
| C6r  | C2H2 | C2H4 | 565.19                                                   | 115.67              |
| C6r  | C2H2 | C60  | 8984.41                                                  | 100.37              |

Table. B7. Angle bending parameters

| i    | j    | k    | l   | $V_1(\text{kcal}\cdot\text{mol}^{-1})$ | $V_2(\text{kcal}\cdot\text{mol}^{-1})$ | $V_3(\text{kcal}\cdot\text{mol}^{-1})$ | $V_4(\text{kcal}\cdot\text{mol}^{-1})$ |
|------|------|------|-----|----------------------------------------|----------------------------------------|----------------------------------------|----------------------------------------|
| Cnyl | C2H4 | C2H2 | C60 | -57.7995                               | -29.0456                               | -5.3513                                | -6.092                                 |

Table. B8. Torsions parameters

## B.2. Fitting of Short Range Interaction

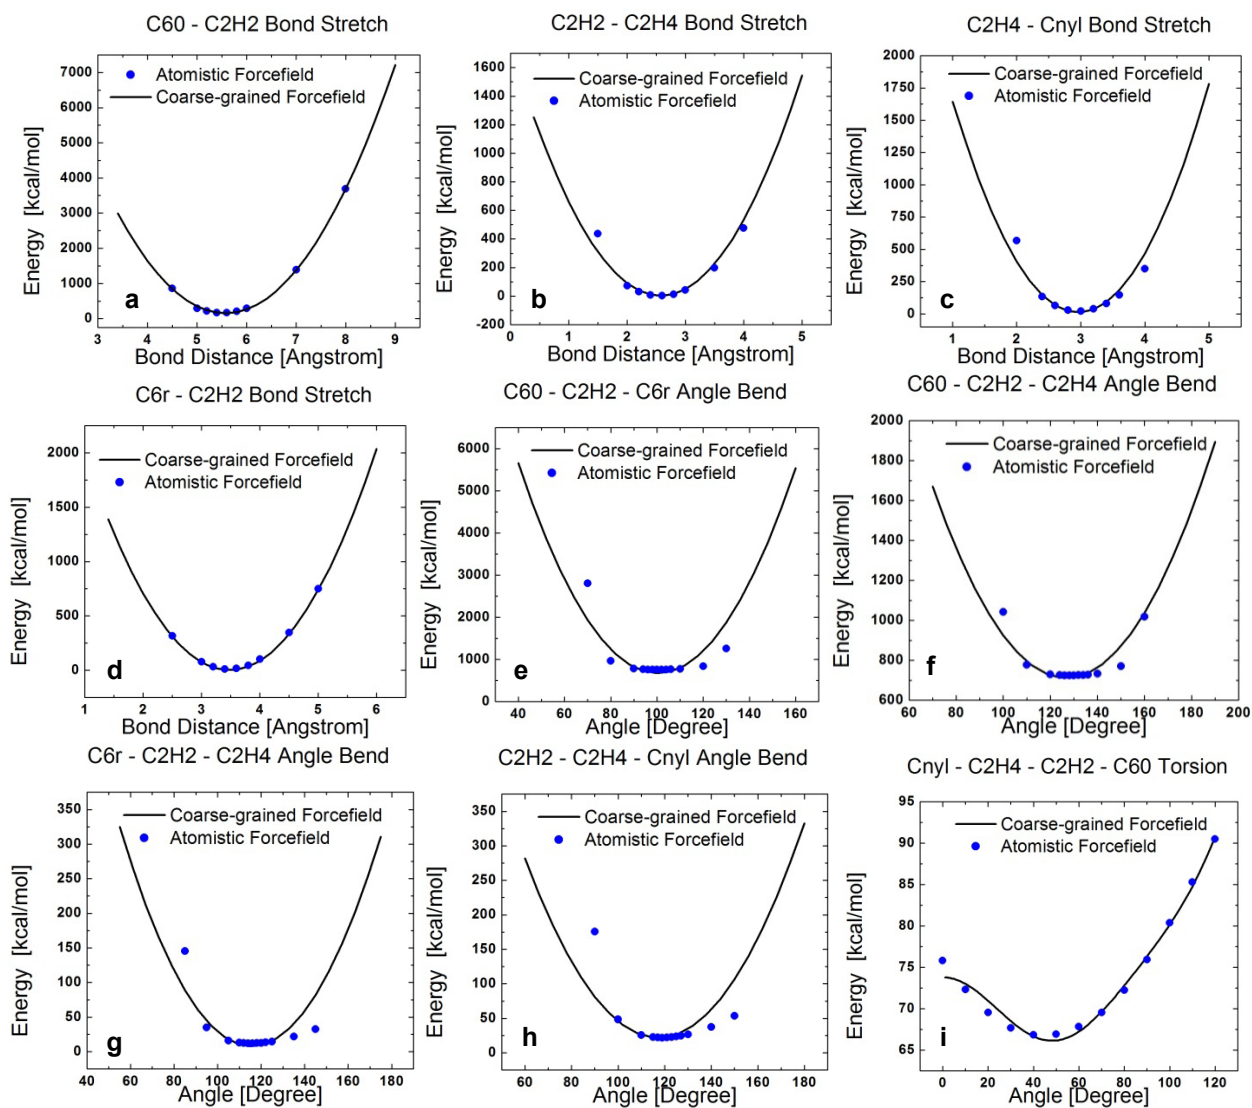

Figure. B2. Fitting against atomistic forcefield was used to obtain short range interaction parameters for coarse-grained forcefield. Here fitting results for all interaction contributions are shown with bond stretching terms: a) C60-C2H2, b) C2H2-C2H4, c) C2H4-Cnyl and d) C6r-C2H2; angle bending terms: e) C60-C2H2-C6r, f) C60-C2H2-C2H4 g) C6r-C2H2-C2H4 and h) C2H2-C2H4-Cnyl; and torsion term: i) Cnyl-C2H4-C2H2-C60

### C. Energy Convergence of Different P3HT:PCBM Interface Configurations

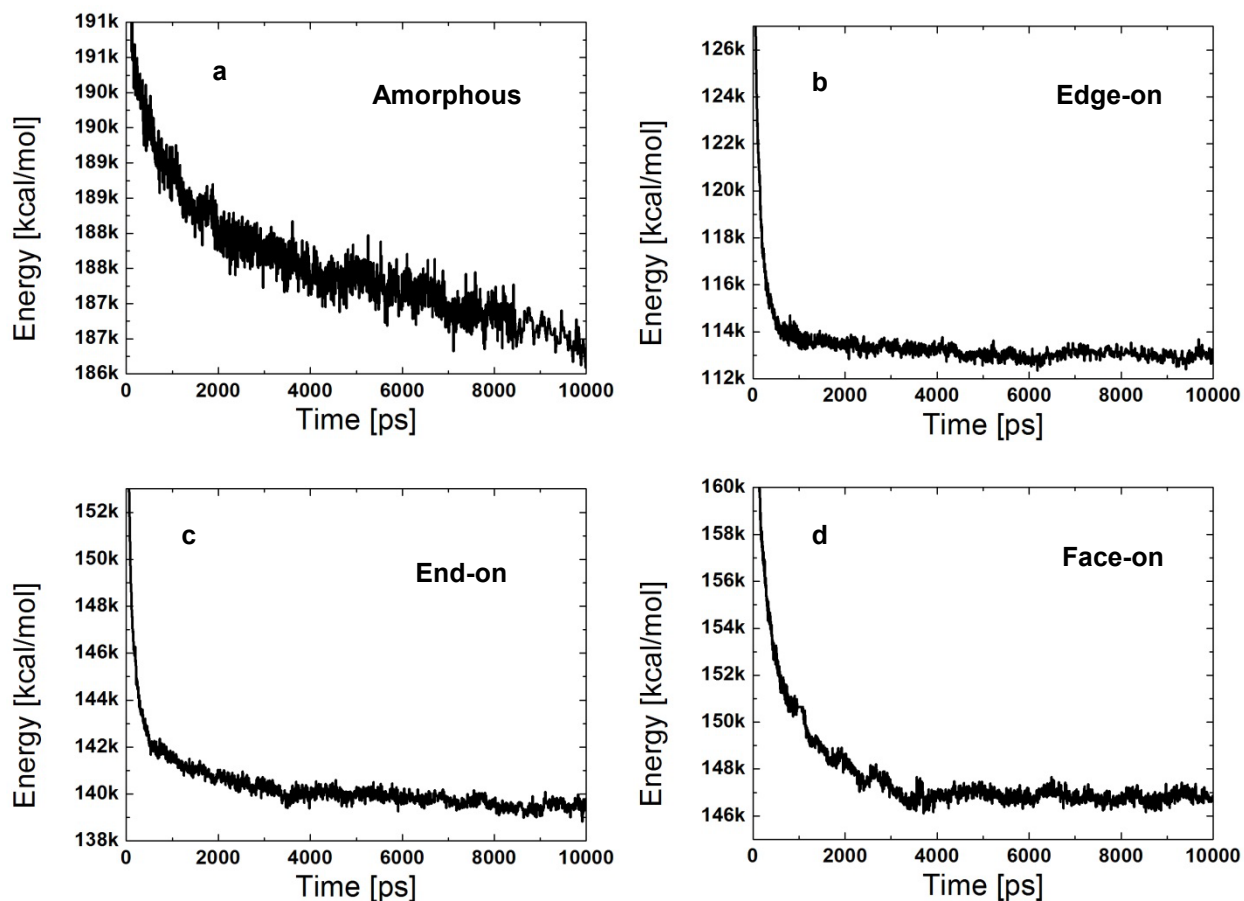

Figure. C1. Energy profile of different P3HT:PCBM interfacial configurations a) Amorphous, b) Edge-on, c) End-on and d) Face-on as a function of simulation time. It is clear that for interfaces between crystalline P3HT and PCBM (b-d), convergence is achieved after about 4,000 ps. For amorphous P3HT:PCBM interface (a) a linear reduction of system energy is observed after 10,000 ps which is attributed to the more pronounced intercalation of PCBM into amorphous P3HT. Analysis of the amorphous P3HT:PCBM interface at a much later time frame would have to be carried out over a more diffuse interface which reduces the accuracy of both interfacial energy calculation and PCBM intercalation analysis.
